# Supplementary material for: Risk stratification in children with cancer and febrile neutropenia: A national, prospective, multicentre validation of nine clinical decision rules
Source: PubMed Central journal article supplement — eClinicalMedicine. 2020 Jan 7;18:100220. doi: 10.1016/j.eclinm.2019.11.013 (PMC6978200; doi:10.1016/j.eclinm.2019.11.013), 2020-01-07
Supplement: mmc1.pdf [file mmc1.pdf]

# Risk stratification in children with cancer and febrile neutropenia: a national, prospective, multicentre validation of nine clinical decision rules.

## Supplementary material

Figure 1. Study flow diagram

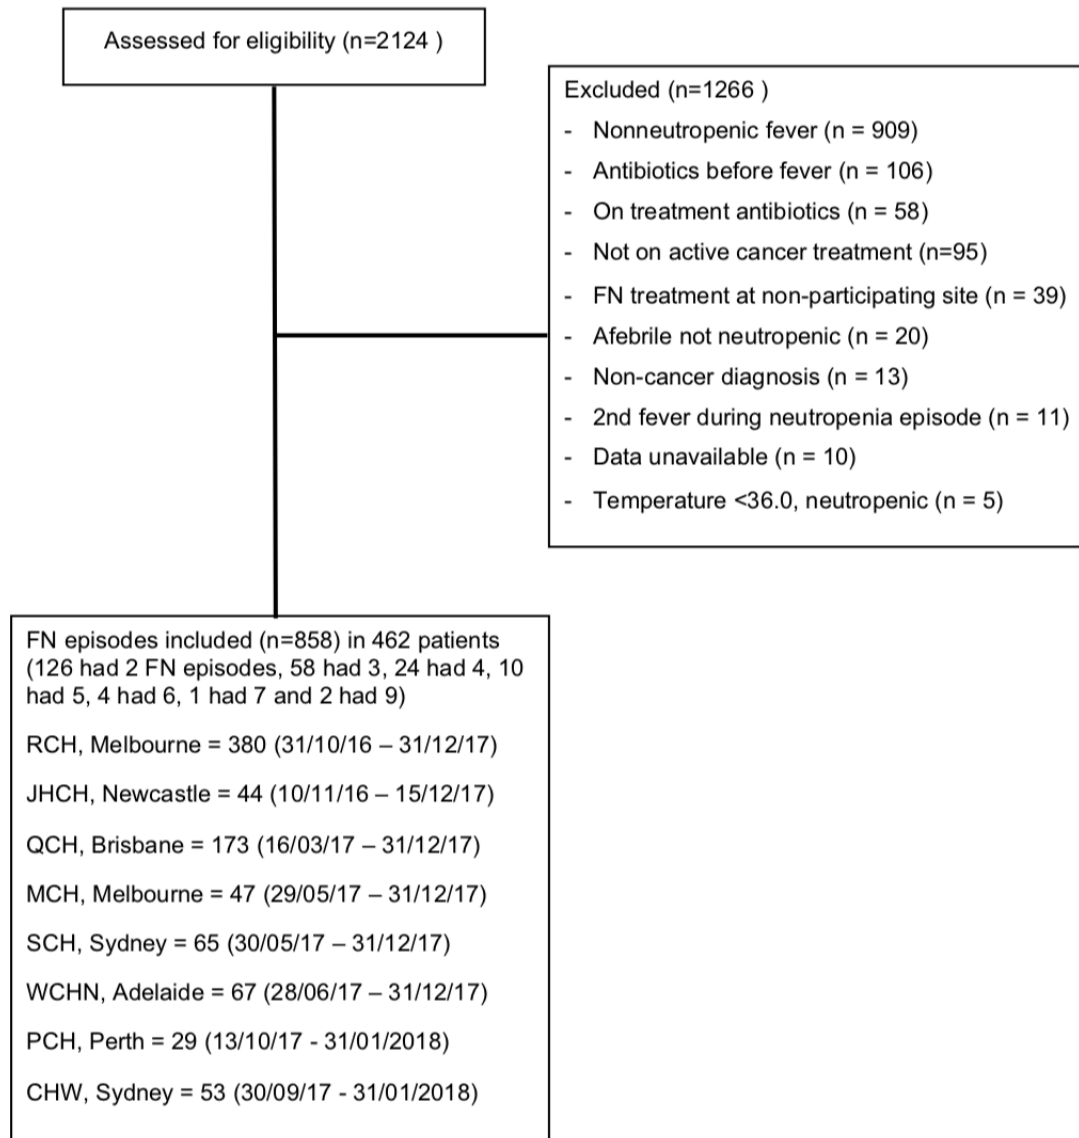

Summary of abbreviations: RCH, Royal Children’s Hospital; JHCH, John Hunter Children’s Hospital; QCH, Queensland Children’s Hospital; MCH, Monash Children’s Hospital; SCH, Sydney Children’s Hospital; WCHN, Women and Children’s Hospital Network; PCH, Perth Children’s Hospital; CHW, Children’s Hospital at Westmead; FN, febrile neutropenia

**Figure 2.** Calibration curve for the Australian recalibrated PICNICC (top) and original (non-recalibrated) (bottom) score showing distribution of predicted probability points and grouped decile of these. The original calibration curve slope was 0.07.

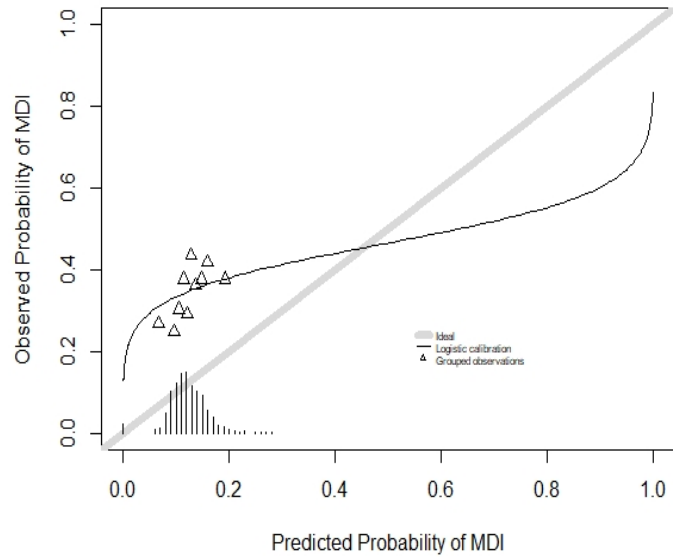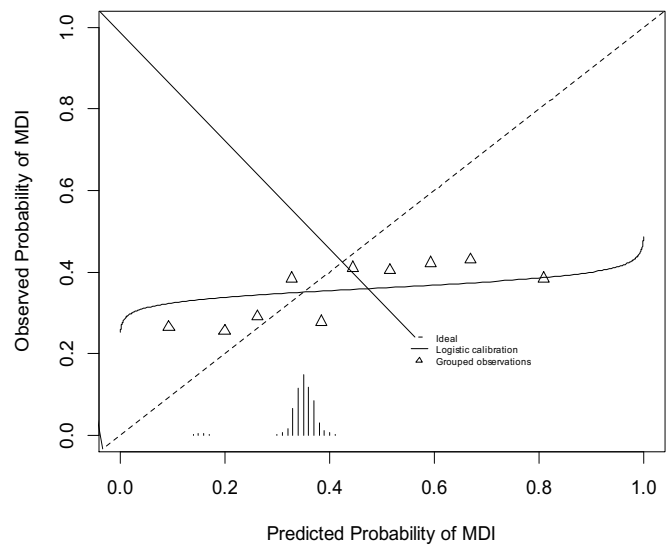

**Table 1.** Sensitivity, specificity, positive predictive value and negative predictive value of derivation study (d) and entire prospective validation cohort (Pv all) and the outpatient onset FN cohort (OP)

| Rule                                    | Epi-sodes | Out-come n (%) | Low risk n (%) | Sensitivity                    |                             | Specificity                   |                             | PPV, % (95% CI)  | NPV,% (95% CI)   | LR   |
|-----------------------------------------|-----------|----------------|----------------|--------------------------------|-----------------------------|-------------------------------|-----------------------------|------------------|------------------|------|
|                                         |           |                |                | % (95% CI)                     | Dif from deriv. % (p value) | % (95% CI)                    | Dif from deriv. % (p value) |                  |                  |      |
| <b>Rules predicting MDI</b>             |           |                |                |                                |                             |                               |                             |                  |                  |      |
| d-PICNICC <sup>1</sup>                  | 909       | 236 (26.0)     | 163 (17.9)     | 91.5 (87.3-94.4)               | -                           | 21.2 (18.3-24.5)              | -                           | 29 (25.8-32.2)   | 87.7 (81.8-91.9) | 1.16 |
| Pv-PICNICC (all)                        | 858       | 296 (34.5)     | 155 (18.1)     | 87.2 (82.9-90.5)               | 4.3 (0.12)                  | 20.8 (17.7-24.4)              | 0.4 (0.89)                  | 36.7 (33.2-40.3) | 75.5 (68.2-81.6) | 1.10 |
| Pv-PICNICC (OP)                         | 689       | 236 (34.3)     | 140 (20.3)     | 86.0 (81.0-89.9) <sup>^</sup>  | 5.5 (0.8)                   | 23.6 (19.9-27.7) <sup>^</sup> | 2.4 (0.38)                  | 37.0 (33.0-41.1) | 76.4 (68.8-82.7) | 1.13 |
| <b>Rules predicting adverse outcome</b> |           |                |                |                                |                             |                               |                             |                  |                  |      |
| d-SPOG AE <sup>2</sup>                  | 423       | 122 (28.2)     | 165 (39)       | 91.8* (85.6-95.5)              | -                           | 51.5 (45.9-57.1)              | -                           | 43.3 (37.5-49.5) | 93.9 (89.2-96.7) | 1.89 |
| Pv-SPOG AE (all)                        | 858       | 320 (37.3)     | 329 (38.3)     | 72.2* (67.0-76.8)              | 19.6 (<0.001)               | 44.6 (40.5-48.8)              | 6.9 (0.07)                  | 43.7 (39.5-47.9) | 73.0 (67.9-77.5) | 1.30 |
| Pv-SPOG AE (OP)                         | 689       | 252 (36.6)     | 268 (38.9)     | 71.0* (65.2-76.3) <sup>^</sup> | 20.8 (<0.001)               | 44.6 (40.0-49.3) <sup>^</sup> | 6.9 (0.07)                  | 42.5 (37.9-47.3) | 72.8 (67.1-77.7) | 1.28 |
| d-Hakim <sup>3</sup>                    | 323       | 47 (14.6)      | 223 (69)       | 74.5 (60.5-84.7)               | -                           | 76.4 (71.1-81.1)              | -                           | 35.0 (26.4-44.7) | 94.6 (90.8-96.9) | 3.16 |
| Pv-Hakim (all)                          | 858       | 151 (17.6)     | 693 (80.8)     | 41.7 (34.2-49.7)               | 32.8 (<0.001)               | 85.6 (82.8-88.0)              | 9.1 (<0.001)                | 38.2 (31.1-45.8) | 87.3 (84.6-89.6) | 2.89 |
| Pv-Hakim (OP)                           | 689       | 103 (14.9)     | 589 (85.5)     | 36.9 (28.2-46.5) <sup>^</sup>  | 37.6 (<0.001)               | 89.4 (86.7-91.7)              | 13.0 (<0.001)               | 38.0 (29.1-47.8) | 89.0 (86.2-91.2) | 3.49 |
| d-Alexander <sup>4</sup>                | 104       | 22 (21.2)      | 55 (53)        | 90.9 (72.2-98.4)               | -                           | 64.6 (53.8-74.1)              | -                           | 40.8 (28.2-54.8) | 96.4 (87.7-99.4) | 2.57 |
| Pv-Alexander (all)                      | 858       | 306 (35.7)     | 354 (41.3)     | 63.7 (58.2-68.9)               | 27.2 (<0.01)                | 44.0 (39.9-48.2)              | 20.6 (<0.001)               | 38.7 (34.5-43.0) | 68.6 (63.6-73.2) | 1.14 |
| Pv-Alexander (OP)                       | 689       | 239 (34.7)     | 354 (51.4)     | 53.6 (47.2-59.8)               | 37.3 (<0.001)               | 54.0 (49.4-58.6)              | 10.6 (0.09)                 | 38.2 (33.2-43.5) | 68.6 (63.6-73.3) | 1.16 |
| d-Klaassen <sup>5</sup>                 | 227       | 43 (18.9)      | 83 (36.6)      | 83.7 (70-91.9)                 | -                           | 41.5 (34.6-48.8)              | -                           | 25.3 (18.8-32.9) | 91.6 (83.6-95.9) | 1.43 |
| Pv-Klaassen (all)                       | 858       | 135 (15.7)     | 207 (24.1)     | 85.2 (78.2-90.2)               | 1.5 (0.81)                  | 25.9 (22.8-29.2)              | 15.7 (<0.001)               | 17.7 (14.9-20.8) | 90.3 (85.6-93.7) | 1.15 |
| Pv-Klaassen (OP)                        | 689       | 97 (14.1)      | 187 (27.1)     | 81.4 (72.6-87.9) <sup>^</sup>  | 2.3 (0.82)                  | 28.6 (25.1-32.3) <sup>^</sup> | 12.9 (<0.001)               | 15.7 (12.8-19.2) | 90.4 (85.3-93.8) | 1.14 |

|                                 |      |            |            |                                |             |                               |               |                  |                  |      |
|---------------------------------|------|------------|------------|--------------------------------|-------------|-------------------------------|---------------|------------------|------------------|------|
| d-Baorto <sup>6</sup>           | 1171 | 189 (16.1) | 164 (14)   | 94.7 (90.5-97.1)               | NA          | 15.7 (13.5-18.1)              | NA            | 17.8 (15.5-20.3) | 93.9 (89.1-96.7) | 1.12 |
| Pv-Baorto (all)                 | 858  | 111 (12.9) | 148 (17.2) | 93.7 (87.6-96.9)               | 1.0 (0.80)  | 18.9 (16.2-21.8)              | 3.2 (0.08)    | 14.6 (12.2-17.4) | 95.3 (90.5-97.7) | 1.16 |
| Pv-Baorto (OP)                  | 689  | 75 (10.9)  | 135 (19.6) | 92.0 (83.6-96.3) <sup>^</sup>  | 2.7 (0.40)  | 21.0 (18.0-24.4) <sup>^</sup> | 5.3 (<0.01)   | 12.5 (10.0-15.5) | 95.6 (90.6-15.5) | 1.17 |
| d-Rackoff <sup>7</sup>          | 115  | 24 (20.9)  | 94 (81.7)  | 41.7 (24.5-61.2)               | -           | 87.9 (79.6-93.1)              | -             | 47.6 (28.3-67.6) | 85.1 (76.5-90.9) | 3.45 |
| Pv-Rackoff <sup>**</sup> (all)  | 858  | 111 (12.9) | 691 (80.5) | 35.1 (26.9-44.4)               | 6.5 (0.64)  | 82.9 (80.0-85.4)              | 5.0 (0.30)    | 23.4 (17.6-30.3) | 89.6 (87.1-91.6) | 2.05 |
| Pv-Rackoff <sup>**</sup> (OP)   | 689  | 75 (10.9)  | 547 (79.4) | 40.0 (29.7-51.3) <sup>^</sup>  | 1.7 (>0.99) | 81.8 (78.5-84.6) <sup>^</sup> | 6.1 (0.18)    | 21.1 (15.2-28.6) | 91.8 (89.2-93.8) | 2.19 |
| d-Ammann <sup>8</sup>           | 348  | 85 (24)    | 100 (28.7) | 95.3 (88.5-98.2)               | -           | 36.5 (30.9-42.5)              | -             | 3.7 (27.1-38.7)  | 96.0 (90.2-98.4) | 1.50 |
| Pv-Ammann (all)                 | 858  | 111 (12.9) | 139 (16.2) | 95.5 (89.9-98.1)               | 0.2 (>0.99) | 17.9 (15.4-20.9)              | 18.6 (<0.001) | 14.7 (12.3-17.5) | 96.4 (91.9-98.5) | 1.16 |
| Pv-Ammann (OP)                  | 689  | 75 (10.9)  | 139        | 93.3 (85.3-97.1) <sup>^</sup>  | 0.2 (>0.99) | 21.8 (18.7-25.3) <sup>^</sup> | 14.7 (<0.001) | 12.7 (10.2-15.8) | 96.4 (91.9-98.5) | 1.19 |
| d-SPOG bacteraemia <sup>9</sup> | 423  | 67 (15.8)  | 54 (12.8)  | 100* (94.6-100)                | -           | 15.2 (11.8-19.3)              | -             | 18.2 (14.6-22.4) | 100 (93.4-100)   | 1.18 |
| Pv-SPOG bacteraemia (all)       | 858  | 111 (12.9) | 133 (15.5) | 94.6* (88.7-97.5)              | 5.4 (0.8)   | 17.1 (14.6-20.0)              | 1.9 (0.44)    | 14.5 (12.1-17.3) | 95.5 (90.6-97.9) | 1.14 |
| Pv-SPOG bacteraemia (OP)        | 689  | 75 (10.9)  | 134        | 92.0* (83.6-96.3) <sup>^</sup> | 8.0 (0.03)  | 20.9 (17.8-24.2) <sup>^</sup> | 5.7 (0.03)    | 12.4 (9.9-15.4)  | 95.5 (90.6-97.9) | 1.16 |

d, derivation study; Pv, prospective validation; CI, confidence interval; PPV, positive predictive value; NPV, negative predictive value; LR, likelihood ratio; Dif, difference.

\*includes episodes with adverse event known at reassessment;

\*\*Rule stratifies patients into 3 groups (ie, low, intermediate and high risk) - intermediate and low risk combined into a single low-risk group.

<sup>^</sup>no significant difference between outpatient onset FN (n=689) and full FN cohort (n=858)

**Table 2.** Discrimination and clinical utility of the PICNICC rule for the prediction of bacteraemia (with 95% confidence intervals)

| Outcome               | AUC-ROC             | Outcome, n (%) | Low-risk, n (%) | Sensitivity (%)     | Specificity (%)     | PPV (%)             | NPV (%)             | LR   |
|-----------------------|---------------------|----------------|-----------------|---------------------|---------------------|---------------------|---------------------|------|
| Bacteraemia (all-858) | 0.70<br>(0.63-0.75) | 111<br>(12.9)  | 155<br>(18.1)   | 92.8<br>(86.4-96.3) | 19.7<br>(17.0-22.7) | 14.7<br>(12.2-17.5) | 94.8<br>(90.2-97.4) | 1.16 |
| Bacteraemia (OP-689)  | 0.69<br>(0.64-0.75) | 75<br>(10.9)   | 140<br>(20.3)   | 90.7<br>(82.0-95.4) | 21.7<br>(18.6-25.1) | 12.4<br>(9.9-15.4)  | 95.0<br>(90.0-97.6) | 1.16 |

AUC-ROC, area under the receiver operating characteristic curve; PPV, positive predictive value; NPV, negative predictive value

**Table 3.** Odds ratio and 95% confidence interval for the individual variables of the PICNICC rule.<sup>1</sup>

|                                        | <b>Odds ratio</b> | <b>lower</b> | <b>upper</b> |
|----------------------------------------|-------------------|--------------|--------------|
| (Intercept)                            | 0.30              | -            | -            |
| Tumour – Acute lymphoblastic leukaemia | 1.00              | referent     | -            |
| Tumour – Acute myeloid leukaemia       | 0.54              | 0.30         | 0.95         |
| Tumour – Ewing’s sarcoma               | 0.34              | 0.18         | 0.64         |
| Tumour – High grade brain              | 0.79              | 0.40         | 1.50         |
| Tumour – Hodgkin lymphoma              | 0.11              | 0.01         | 0.63         |
| Tumour – High risk neuroblastoma       | 0.51              | 0.24         | 1.04         |
| Tumour – low grade brain               | 0.63              | 0.19         | 1.75         |
| Tumour – low risk neuroblastoma        | 0.62              | 0.03         | 6.54         |
| Tumour – Non-hodgkin lymphoma          | 0.61              | 0.32         | 1.11         |
| Tumour – Osteosarcoma                  | 0.48              | 0.24         | 0.93         |
| Tumour – Other                         | 0.59              | 0.29         | 1.15         |
| Tumour – Relapsed acute leukaemia      | 1.14              | 0.61         | 2.12         |
| Tumour - retinoblastoma                | 1.62E-06          | NA           | 1.98E+19     |
| Tumour – Rhabdomyosarcoma              | 0.55              | 0.26         | 1.09         |
| Tumour – Wilm’s                        | 0.36              | 0.10         | 1.03         |
| Temperature (centred at 37°C)          | 1.53              | 1.18         | 1.99         |
| Severely unwell                        | 1.00              | 0.57         | 1.71         |
| Haemoglobin                            | 0.99              | 0.92         | 1.06         |
| White cell count (natural log)         | 0.93              | 0.76         | 1.14         |
| Absolute monocyte count (natural log)  | 0.94              | 0.85         | 1.05         |

**Table 4.** Details of missed bacteraemia episodes, known after Day 2 assessment, in outpatient onset FN episodes

| Rule (no. missed bacteraemia)           | Pathogens                                                                                                                                                                                                                                                                                                                                                                                                                   |
|-----------------------------------------|-----------------------------------------------------------------------------------------------------------------------------------------------------------------------------------------------------------------------------------------------------------------------------------------------------------------------------------------------------------------------------------------------------------------------------|
| <b>Rules predicting MDI</b>             |                                                                                                                                                                                                                                                                                                                                                                                                                             |
| PICNICC (n=5)                           | Gram positive: Coagulase negative staphylococci (CoNS) (n=2), oral viridans streptococci (OVS)<br>Gram negative: <i>Capnocytophaga sputigena</i><br>Fungal: <i>Candida albicans</i>                                                                                                                                                                                                                                         |
| <b>Rules predicting adverse outcome</b> |                                                                                                                                                                                                                                                                                                                                                                                                                             |
| SPOG-AE (n=17)*                         | Gram positive: <i>Staphylococcus aureus</i> , <i>Enterococcus</i> spp (n=2), CoNS (n=3), OVS (n=2), <i>Bacillus</i> spp, <i>Clostridium septicum</i><br>Gram negative: <i>Escherichia coli</i> (n=2), <i>Klebsiella pneumoniae</i> , <i>Neisseria</i> spp, <i>C. sputigena</i> , <i>Acinetobacter baumannii</i> , <i>Pseudomonas</i> spp, <i>Moroxella</i> spp, <i>Enterobacter cloacae</i><br>Fungal: <i>C. albicans</i> , |
| Hakim (n=28)**                          | Gram positive: CoNS (n=5), <i>S. aureus</i> (n=2), OVS (n=5), <i>Enterococcus</i> spp (n=2), <i>C. septicum</i> , <i>Bacillus</i> spp, <i>Abiotrophia defectiva</i><br>Gram negative: <i>E. coli</i> (n=4), <i>K. pneumoniae</i> (n=2), <i>Neisseria</i> spp (n=2), <i>Capnocytophaga sputigena</i> , <i>Pseudomonas</i> spp., <i>S. paucimobilis</i> , <i>E. cloacae</i><br>Fungal: <i>C. albicans</i> (n=2)               |
| Alexander (n=13)                        | Gram positive: CoNS (n=3), OVS, <i>S. aureus</i> , <i>Bacillus</i> spp,<br>Gram negative: <i>Neisseria</i> spp (n=2), <i>Klebsiella</i> spp (n=2), <i>E. coli</i> (n=2), <i>S. paucimobilis</i>                                                                                                                                                                                                                             |
| Klaassen (n=4)                          | Gram positive: CoNS, OVS, <i>Abiotrophia</i> spp<br>Gram negative: <i>C. sputigena</i>                                                                                                                                                                                                                                                                                                                                      |
| <b>Rules predicting bacteraemia</b>     |                                                                                                                                                                                                                                                                                                                                                                                                                             |
| SPOG-bact (n=6)                         | Gram positive: CoNS (n=2), <i>S. aureus</i> , <i>E. faecalis</i><br>Gram negative: <i>C. sputigena</i> , <i>Pseudomonas</i> spp                                                                                                                                                                                                                                                                                             |
| Ammann (n=3)                            | Gram positive: CoNS, OVS<br>Fungal: <i>C. albicans</i>                                                                                                                                                                                                                                                                                                                                                                      |
| Baorto (n=3)                            | Gram positive: CoNS, OVS, <i>Abiotrophia</i> spp                                                                                                                                                                                                                                                                                                                                                                            |
| Rackoff (n=25)*                         | Gram positive: CoNS (n=4), OVS (n=4), <i>S. aureus</i> (n=2), <i>Enterococcus</i> spp, <i>Bacillus</i> spp, <i>Abiotrophia</i> spp, <i>C. septicum</i><br>Gram negative: <i>E. coli</i> (n=2), <i>Neisseria</i> spp (n=3) <i>K. pneumoniae</i> (n=2), <i>Pseudomonas</i> spp (n=2) <i>C. sputigena</i> , <i>S. paucimobilis</i> , <i>E. cloacae</i><br>Fungal: <i>C. albicans</i> (n=2)                                     |

\* includes n=4 low risk and n=21 intermediate risk episodes; \*\*1 episode had 2 pathogens and 1 had 3 pathogens

## REFERENCES

- Phillips RS, Sung L, Ammann RA, et al. Predicting microbiologically defined infection in febrile neutropenic episodes in children: global individual participant data multivariable meta-analysis. *Br J Cancer*. England; 2016: 623-30.
- Ammann RA, Bodmer N, Hirt A, et al. Predicting adverse events in children with fever and chemotherapy-induced neutropenia: the prospective multicenter SPOG 2003 FN study. *J Clin Oncol* 2010; **28**:2008-14.
- Hakim H, Flynn PM, Srivastava DK, et al. Risk prediction in pediatric cancer patients with fever and neutropenia. *Pediatr Infect Dis J* 2010; **29**:53-9.
- Alexander SW, Wade KC, Hibberd PL, Parsons SK. Evaluation of risk prediction criteria for episodes of febrile neutropenia in children with cancer. *J Pediatr Hematol Oncol* 2002; **24**:38-42.
- Klaassen RJ, Goodman TR, Pham B, Doyle JJ. "Low-risk" prediction rule for pediatric oncology patients presenting with fever and neutropenia. *J Clin Oncol* 2000; **18**:1012-9.
- Baorto EP, Aquino VM, Mullen CA, Buchanan GR, DeBaun MR. Clinical parameters associated with low bacteremia risk in 1100 pediatric oncology patients with fever and neutropenia. *Cancer* 2001; **92**:909-13.
- Rackoff WR, Gonin R, Robinson C, Kreissman SG, Breitbart PB. Predicting the risk of bacteremia in children with fever and neutropenia. *J Clin Oncol* 1996; **14**:919-24.
- Ammann RA, Hirt A, Lüthy AR, Aebi C. Predicting bacteremia in children with fever and chemotherapy-induced neutropenia. *Pediatr Infect Dis J* 2004; **23**:61-7.
- Agyeman P, Aebi C, Hirt A, et al. Predicting bacteremia in children with cancer and fever in chemotherapy-induced neutropenia: results of the prospective multicenter SPOG 2003 FN study. *Pediatr Infect Dis J* 2011; **30**:e114-9.
